# Supplementary material for: Effectively suppressing lithium dendrite growth via an es-LiSPCE single-ion conducting nano fiber membrane
Source: Royal Society of Chemistry journal article supplement (doi:10.1039/c9ta12783f), 2020-01-01
Supplement: c9ta12783f1.pdf [file c9ta12783f1.pdf]

## Supporting information

### Effectively suppressing lithium dendrite growth via an es-LiSPCE single-ion conducting nano fiber membrane

Yang He<sup>1</sup>, Jiaying Wang<sup>1</sup>, Yunfeng Zhang<sup>1\*</sup>, Shikang Huo<sup>1</sup>, Danli Zeng<sup>1</sup>, Yun Lu<sup>2</sup>,  
Zhihong Liu<sup>3</sup>, Deli Wang<sup>2\*</sup>, and Hansong Cheng<sup>1</sup>

<sup>1</sup> Sustainable Energy Laboratory, Faculty of Material Science and Chemistry, China  
University of Geosciences (Wuhan), 388 Lumo RD, Wuhan 430074, China. E-mail:  
zhangyf329@gmail.com

<sup>2</sup> Key Laboratory of Material Chemistry for Energy Conversion and Storage  
(Huazhong University of Science and Technology), Ministry of Education, Hubei Key  
Laboratory of Material Chemistry and Service Failure, School of Chemistry and  
Chemical Engineering, Huazhong University of Science and Technology, Wuhan  
430074, China, E-mail: wangdl81125@hust.edu.cn

<sup>3</sup> School of Environment and Civil Engineering, Dongguan University of Technology,  
No.1, Daxue Road, Songshan Lake, Dongguan, Guangdong Province, 523808 P. R.  
China.

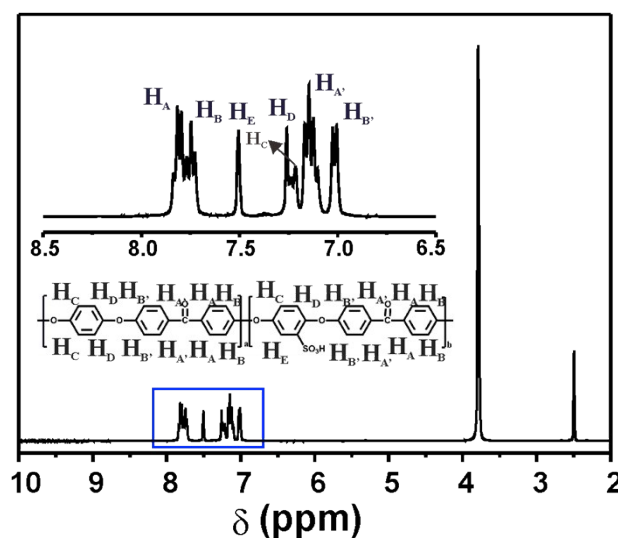

Fig. S1. <sup>1</sup>H NMR spectrum of SPEEK



**Table S1.** The chemical shift and relative integration of BAPFDS in DMSO-*d*<sub>6</sub>.

|                 | Chemical shift (ppm) | Relative integration |
|-----------------|----------------------|----------------------|
| H <sub>A</sub>  | 7.80-7.82            | 2.55                 |
| H <sub>B</sub>  | 7.75-7.80            | 2.29                 |
| H <sub>C</sub>  | 7.21-7.24            | 1.12                 |
| H <sub>D</sub>  | 7.24-7.26            | 0.78                 |
| H <sub>E</sub>  | 7.50                 | 1.00                 |
| H <sub>A'</sub> | 7.15-7.24            | 3.74                 |
| H <sub>B'</sub> | 7.01-7.03            | 1.95                 |

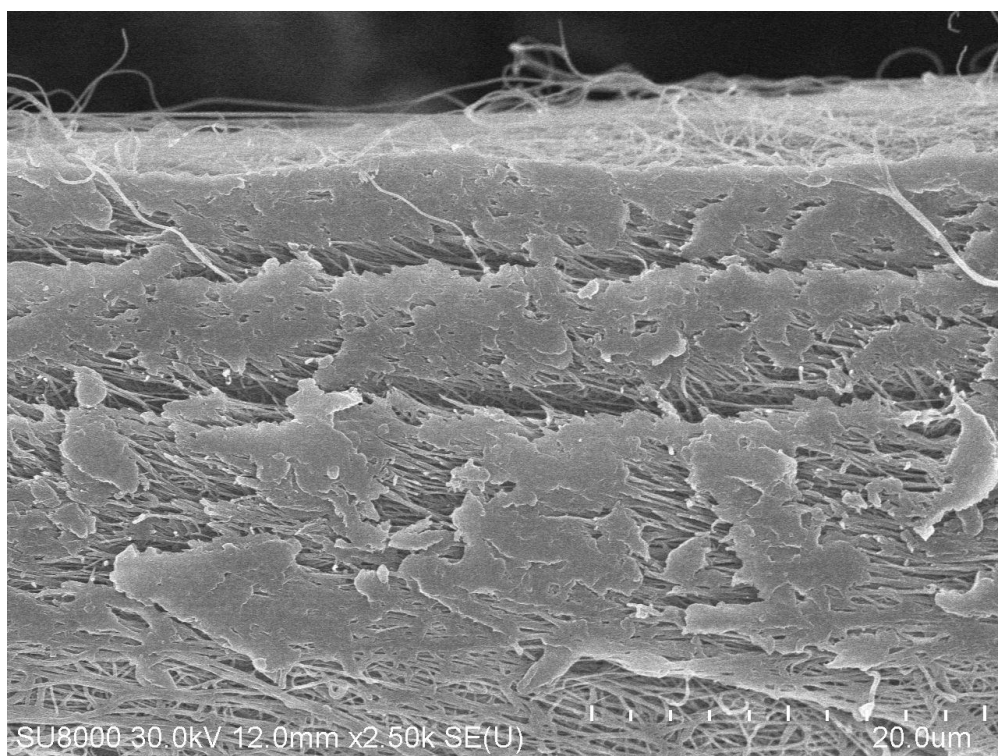

**Fig. S2.** The cross-section view of the *es*-LISPCE membrane.

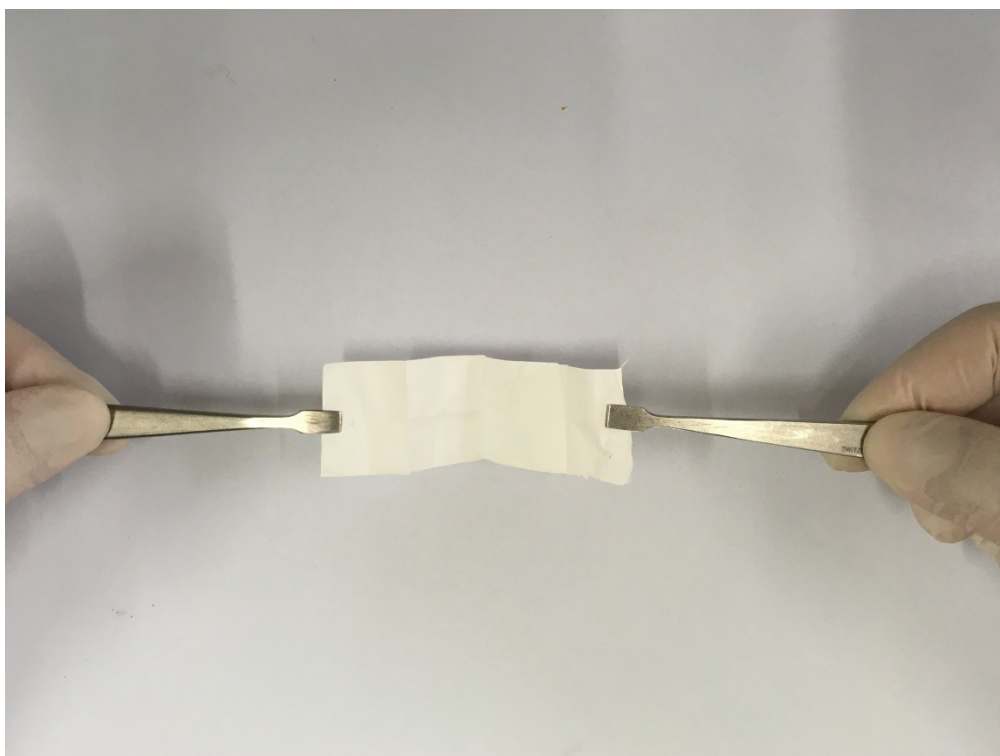

**Fig. S3.** A digital image of the *es*-LiSPCE nanofiber membrane after the scrunch test.

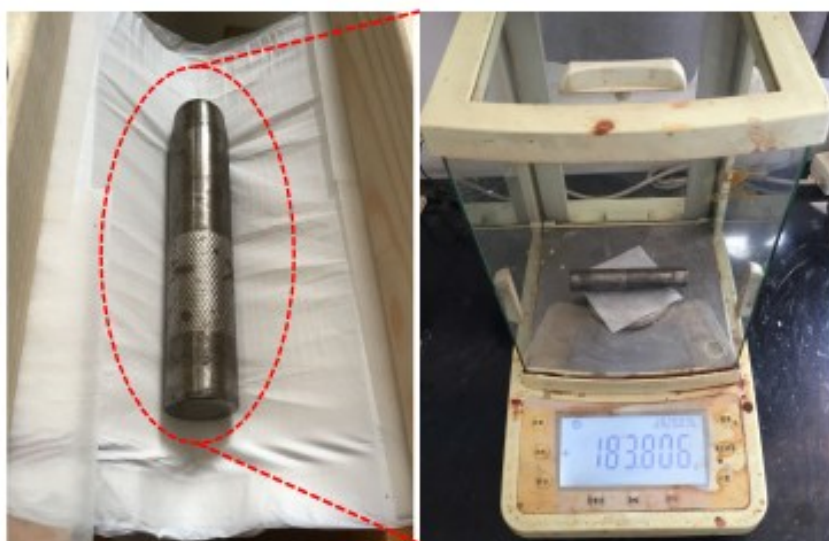

**Fig. S4.** A digital image of the *es*-LiSPCE nanofiber membrane with appropriate mechanical strength.

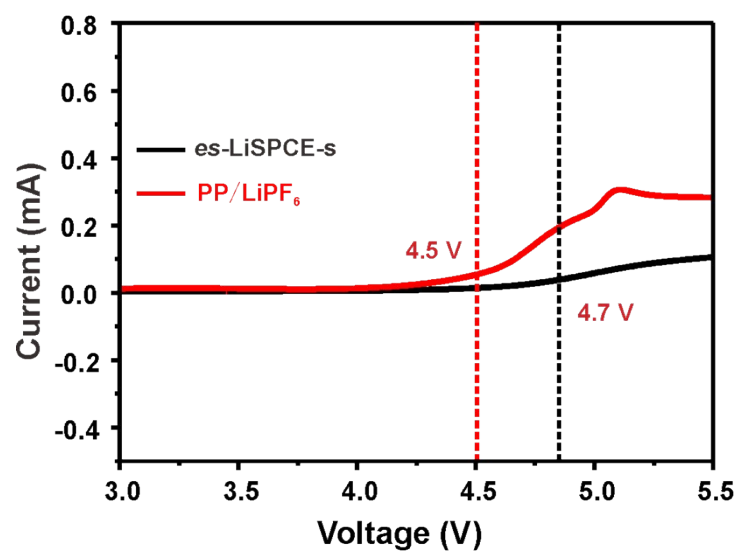

**Fig. S5.** Electrochemical stability of the *es*-LiSPCE-s and PP/1M LiPF<sub>6</sub> in EC/DMC electrolyte systems at room temperature.
